# Supplementary material for: Finding the right thermal limit: a framework to reconcile ecological, physiological and methodological aspects of CTmax in ectotherms
Source: Oxford University Press journal article supplement (doi:10.1242/jeb.244514), 2022-10-01
Supplement: jeb244514supp.pdf [file jeb244514supp.pdf]

**Table S1.** References for thermal performance curves (TPCs) and acute heat tolerance measures presented in main text Fig. 1.

| Species                        | Trait/data type | Details                                                             | Data source                                                                                                                                                                                                                                                                                                                                                                                                                                                                                                                                                                                                                                                                                                                                                                                                                                                                                                                                                                       |
|--------------------------------|-----------------|---------------------------------------------------------------------|-----------------------------------------------------------------------------------------------------------------------------------------------------------------------------------------------------------------------------------------------------------------------------------------------------------------------------------------------------------------------------------------------------------------------------------------------------------------------------------------------------------------------------------------------------------------------------------------------------------------------------------------------------------------------------------------------------------------------------------------------------------------------------------------------------------------------------------------------------------------------------------------------------------------------------------------------------------------------------------|
| <i>Drosophila melanogaster</i> | Growth          | Growth rate before eclosion                                         | <b>Frazier, M. R., Woods, H. A. and Harrison, J. F.</b> (2001). Interactive effects of rearing temperature and oxygen on the development of <i>Drosophila melanogaster</i> . <i>Physiol. Biochem. Zool.</i> <b>74</b> , 641–650.                                                                                                                                                                                                                                                                                                                                                                                                                                                                                                                                                                                                                                                                                                                                                  |
|                                | Fitness proxy   | Product of fecundity, developmental speed and developmental success | <b>Overgaard, J., Kearney, M. R. and Hoffmann, A. A.</b> (2014). Sensitivity to thermal extremes in Australian <i>Drosophila</i> implies similar impacts of climate change on the distribution of widespread and tropical species. <i>Glob. Chang. Biol.</i> <b>20</b> , 1738–1750.                                                                                                                                                                                                                                                                                                                                                                                                                                                                                                                                                                                                                                                                                               |
|                                | Speed           | Running speed                                                       | <b>Soto-Padilla, A., Ruijsink, R., Sibon, O. C. M., van Rijn, H. and Billeter, J.-C.</b> (2018). Thermosensory perception regulates speed of movement in response to temperature changes in <i>Drosophila melanogaster</i> . <i>J. Exp. Biol.</i> jeb.174151.                                                                                                                                                                                                                                                                                                                                                                                                                                                                                                                                                                                                                                                                                                                     |
|                                | SMR             | Standard metabolic rate                                             | <b>Bozinovic, F., Catalan, T. P., Estay, S. A. and Sabat, P.</b> (2013). Acclimation to daily thermal variability drives the metabolic performance curve. <i>Evol. Ecol. Res.</i> <b>15</b> , 579–587.                                                                                                                                                                                                                                                                                                                                                                                                                                                                                                                                                                                                                                                                                                                                                                            |
|                                | TDT             | Heat knockdown time in exposure to constant temperature             | <b>Jørgensen, L. B., Malte, H. and Overgaard, J.</b> (2019). How to assess <i>Drosophila</i> heat tolerance: Unifying static and dynamic tolerance assays to predict heat distribution limits. <i>Funct. Ecol.</i> <b>33</b> , 629–642.                                                                                                                                                                                                                                                                                                                                                                                                                                                                                                                                                                                                                                                                                                                                           |
|                                | $CT_{max}$      | $CT_{max}$ measured in dynamic assays using various ramping rates   | <b>Chown, S. L., Jumbam, K. R., Sørensen, J. G. and Terblanche, J. S.</b> (2009). Phenotypic variance, plasticity and heritability estimates of critical thermal limits depend on methodological context. <i>Funct. Ecol.</i> <b>23</b> , 133–140.<br><b>Hangartner, S. and Hoffmann, A. A.</b> (2016). Evolutionary potential of multiple measures of upper thermal tolerance in <i>Drosophila melanogaster</i> . <i>Funct. Ecol.</i> <b>30</b> , 442–452.<br><b>Jørgensen, L. B., Malte, H. and Overgaard, J.</b> (2019). How to assess <i>Drosophila</i> heat tolerance: Unifying static and dynamic tolerance assays to predict heat distribution limits. <i>Funct. Ecol.</i> <b>33</b> , 629–642.<br><b>Manenti, T., Cunha, T. R., Sørensen, J. G. and Loeschcke, V.</b> (2018). How much starvation, desiccation and oxygen depletion can <i>Drosophila melanogaster</i> tolerate before its upper thermal limits are affected? <i>J. Insect Physiol.</i> <b>111</b> , 1–7. |

|                              |               |                                                                   |                                                                                                                                                                                                                                                                                                                                                                                                                                                                                                                                                                                                                                                                                                                                                                                                                                                                                                                                                                                                                                                                                                                                                                                      |
|------------------------------|---------------|-------------------------------------------------------------------|--------------------------------------------------------------------------------------------------------------------------------------------------------------------------------------------------------------------------------------------------------------------------------------------------------------------------------------------------------------------------------------------------------------------------------------------------------------------------------------------------------------------------------------------------------------------------------------------------------------------------------------------------------------------------------------------------------------------------------------------------------------------------------------------------------------------------------------------------------------------------------------------------------------------------------------------------------------------------------------------------------------------------------------------------------------------------------------------------------------------------------------------------------------------------------------|
| <i>Salvelinus fontinalis</i> | Growth        | Growth rate                                                       | <b>McCormick, J. H., Hokanson, K. E. F. and Jones, B. R.</b> (1972). Effects of Temperature on Growth and Survival of Young Brook Trout, <i>Salvelinus fontinalis</i> . <i>J. Fish. Res. Board Canada</i> <b>29</b> , 1107–1112.                                                                                                                                                                                                                                                                                                                                                                                                                                                                                                                                                                                                                                                                                                                                                                                                                                                                                                                                                     |
|                              | Fitness proxy | Viable eggs per female                                            | <b>Hokanson, K. E. F., McCormick, J. H., Jones, B. R. and Tucker, J. H.</b> (1973). Thermal Requirements for Maturation, Spawning, and Embryo Survival of the Brook Trout, <i>Salvelinus fontinalis</i> . <i>J. Fish. Res. Board Canada</i> <b>30</b> , 975–984.                                                                                                                                                                                                                                                                                                                                                                                                                                                                                                                                                                                                                                                                                                                                                                                                                                                                                                                     |
|                              | Speed         | Cruising swim speed                                               | <b>Graham, J. M.</b> (1949). Some effects of temperature and oxygen pressure on the metabolism and activity of the speckled trout, <i>Salvelinus fontinalis</i> . <i>Can. J. Res.</i> <b>27d</b> , 270–288.                                                                                                                                                                                                                                                                                                                                                                                                                                                                                                                                                                                                                                                                                                                                                                                                                                                                                                                                                                          |
|                              | SMR           | Standard metabolic rate                                           | <b>Durhack, T. C., Mochnacz, N. J., Macnaughton, C. J., Enders, E. C. and Treberg, J. R.</b> (2021). Life through a wider scope: Brook Trout ( <i>Salvelinus fontinalis</i> ) exhibit similar aerobic scope across a broad temperature range. <i>J. Therm. Biol.</i> <b>99</b> , 102929.                                                                                                                                                                                                                                                                                                                                                                                                                                                                                                                                                                                                                                                                                                                                                                                                                                                                                             |
|                              | TDT           | Heat knockdown time in exposure to constant temperature           | <b>Brett, J. R.</b> (1956). Some Principles in the Thermal Requirements of Fishes. <i>Q. Rev. Biol.</i> <b>31</b> , 75–87.                                                                                                                                                                                                                                                                                                                                                                                                                                                                                                                                                                                                                                                                                                                                                                                                                                                                                                                                                                                                                                                           |
|                              | $CT_{max}$    | $CT_{max}$ measured in dynamic assays using various ramping rates | <p><b>Carline, R. F. and Machung, J. F.</b> (2001). Critical Thermal Maxima of Wild and Domestic Strains of Trout. <i>Trans. Am. Fish. Soc.</i> <b>130</b>, 1211–1216.</p> <p><b>Galbreath, P. F., Adams, N. D. and Martin, T. H.</b> (2004). Influence of heating rate on measurement of time to thermal maximum in trout. <i>Aquaculture</i> <b>241</b>, 587–599.</p> <p><b>Lee, R. M. and Rinne, J. N.</b> (1980). Critical thermal maxima of five trout species in the Southwestern United States. <i>Trans. Am. Fish. Soc.</i> <b>109</b>, 632–635.</p> <p><b>Morrison, S. M., Mackey, T. E., Durhack, T., Jeffrey, J. D., Wiens, L. M., Mochnacz, N. J., Hasler, C. T., Enders, E. C., Treberg, J. R. and Jeffries, K. M.</b> (2020). Sub-lethal temperature thresholds indicate acclimation and physiological limits in brook trout <i>Salvelinus fontinalis</i>. <i>J. Fish Biol.</i> <b>97</b>, 583–587.</p> <p><b>Shaughnessy, C. A. and McCormick, S. D.</b> (2018). Reduced thermal tolerance during salinity acclimation in brook trout (<i>Salvelinus fontinalis</i>) can be rescued by prior treatment with cortisol. <i>J. Exp. Biol.</i> <b>221</b>, jeb169557.</p> |

|                             |            |                                                                   |                                                                                                                                                                                                                                                                                                                               |
|-----------------------------|------------|-------------------------------------------------------------------|-------------------------------------------------------------------------------------------------------------------------------------------------------------------------------------------------------------------------------------------------------------------------------------------------------------------------------|
| <i>Dreissena polymorpha</i> | Growth     | Shell-length growth                                               | <b>Churchill, C. J., Hoeninghaus, D. J. and La Point, T. W.</b> (2017). Environmental conditions increase growth rates and mortality of zebra mussels ( <i>Dreissena polymorpha</i> ) along the southern invasion front in North America. <i>Biol. Invasions</i> <b>19</b> , 2355–2373.                                       |
|                             | Attachment | Attachment strength                                               | <b>Kobak, J.</b> (2006). Factors influencing the attachment strength of <i>Dreissena polymorpha</i> (Bivalvia). <i>Biofouling</i> <b>22</b> , 141–150.                                                                                                                                                                        |
|                             | Filtration | Gill filtration rate                                              | <b>Lei, J., Payne, B. S. and Wang, S. Y.</b> (1996). Filtration dynamics of the zebra mussel, <i>Dreissena polymorpha</i> . <i>Can. J. Fish. Aquat. Sci.</i> <b>53</b> , 29–37.                                                                                                                                               |
|                             | SMR        | Standard metabolic rate                                           | <b>Alexander, J. E. and McMahon, R. F.</b> (2004). Respiratory response to temperature and hypoxia in the zebra mussel <i>Dreissena polymorpha</i> . <i>Comp. Biochem. Physiol. - A Mol. Integr. Physiol.</i> <b>137</b> , 425–434.                                                                                           |
|                             | TDT        | Heat knockdown time in exposure to constant temperature           | <b>McMahon, R. F., Matthews, M. A., Ussery, T. A., Chase, R. and Clarke, M.</b> (1995). <i>Further studies of heat tolerance of zebra mussels: effects of temperature acclimation and chronic exposure to lethal temperatures</i> . Technical Report EL-95-9, U.S. Army Engineer Waterways Experiment Station, Vicksburg, MS. |
|                             | $CT_{max}$ | $CT_{max}$ measured in dynamic assays using various ramping rates | <b>McMahon, R. F. and Ussery, T. A.</b> (1995). <i>Thermal tolerance of zebra mussels (<i>Dreissena polymorpha</i>) relative to rate of temperature increase and acclimation temperature</i> . Technical Report EL-95-10, U.S. Army Engineer Waterways Experiment Station, Vicksburg, MS.                                     |

**Table S2.** References for thermal death time (TDT) curves presented in main text **Fig. 2.**

| Species                         | Data source                                                                                                                                                                                                                                                                                                                  |
|---------------------------------|------------------------------------------------------------------------------------------------------------------------------------------------------------------------------------------------------------------------------------------------------------------------------------------------------------------------------|
| <i>Daphnia magna</i>            | <b>Kivivuori, L. A. and Lahdes, E. O.</b> (1996). How to measure the thermal death of <i>Daphnia</i> ? A comparison of different heat tests and effects of heat injury. <i>J. Therm. Biol.</i> <b>21</b> , 305–311.                                                                                                          |
| <i>Dreissena polymorpha</i>     | <b>McMahon, R. F., Matthews, M. A., Ussery, T. A., Chase, R. and Clarke, M.</b> (1995). <i>Further studies of heat tolerance of zebra mussels: effects of temperature acclimation and chronic exposure to lethal temperatures.</i> Technical Report EL-95-9, U.S. Army Engineer Waterways Experiment Station, Vicksburg, MS. |
| <i>Drosophila melanogaster</i>  | <b>Jørgensen, L. B., Malte, H. and Overgaard, J.</b> (2019). How to assess <i>Drosophila</i> heat tolerance: Unifying static and dynamic tolerance assays to predict heat distribution limits. <i>Funct. Ecol.</i> <b>33</b> , 629–642.                                                                                      |
| <i>Drosophila subobscura</i>    | <b>Hollingsworth, M. J.</b> (1969). Temperature and length of life in <i>Drosophila</i> . <i>Exp. Gerontol.</i> <b>4</b> , 49–55.                                                                                                                                                                                            |
| <i>Lepomis macrochirus</i>      | <b>Hart, J. S.</b> (1952). <i>Geographic Variations of Some Physiological and Morphological Characters in Certain Freshwater Fish.</i> University of Toronto Press.                                                                                                                                                          |
| <i>Micropterus salmoides</i>    | <b>Hart, J. S.</b> (1952). <i>Geographic Variations of Some Physiological and Morphological Characters in Certain Freshwater Fish.</i> University of Toronto Press.                                                                                                                                                          |
| <i>Mytilus edulis</i>           | <b>Wallis, R. L.</b> (1975). Thermal Tolerance of <i>Mytilus edulis</i> of Eastern Australia. <i>Mar. Biol.</i> <b>30</b> , 183–191.                                                                                                                                                                                         |
| <i>Oncorhynchus tshawytscha</i> | <b>Coutant, C. C.</b> (1970). <i>Thermal resistance of adult coho (Oncorhynchus kisutch) and jack chinook (O. tshawytscha) salmon, and adult steelhead trout (Salmo gairdneri) from the Columbia River.</i> No. BNWL-1508, Battelle-Northwest, Richland, WA (United States).                                                 |
